# Supplementary material for: Electron irradiation effects on ultra-thin silicon IBC solar cells of varying thickness: Analytical modelling and experimental demonstration of the critical design factors of silicon solar cells for space application
Source: Research Square preprint supplement (doi:10.21203/rs.3.rs-7571577/v1), 2025-10-14
Supplement: Supplementary file 1 [file 5d30fc9a3adb0ce75d687e1e.docx]

**Supplemental information**

Electron irradiation effects on ultra-thin silicon IBC solar cells of varying thickness: Analytical modelling and experimental demonstration of the critical design factors of silicon solar cells for space application.

Zhenyu Sun*1, Li Wang*1, Zhuangyi Zhou2, Xiaoxing Lou1, Tetsuya Nakamura3, Mitsuru Imaizumi4, Takeshi Ohshima5,6, Shin-ichiro Sato5, Brett Hallam1, Nicholas J. Ekins-Daukes1, Ivan Perez-Wurfl1

1 UNSW Sydney, Australia

2 University of Luxembourg, Grand Duchy of Luxembourg

3 Japan Aerospace Exploration Agency (JAXA), Japan

4 Sanjo City University, Japan

5 National Institutes for Quantum Science and Technology (QST), Japan.

6 Tohoku University, Japan

Table S1 Quokka3 simulation parameters used for cell modeling of IBC cells after electron irradiation

| | Syntax = 'generic'; | | --- | |  | | Bulk.Mesh.Quality='very-fine'; | |  | | Domain.DeviceType = 'semiconductor device'; | | Domain.Dimensions = 3; | | Domain.Wz = 85; % um by defult | | Domain.Wx = 26 mm; | | Domain.Wy = 1 mm; | |  | | Sweep.Enable = 0; % enable sweep | | Sweep.NGroups = 1; | | Sweep.GroupA(1).Parameter = 'Domain.Wz'; | | Sweep.GroupA(1).Values = [160, 130, 110, 85, 60, 40, 20, 10]; | |  | | Solver.SolutionType = 'light JV-curve'; | | Solver.JVCurve.VtermStepSize = 'fine'; | | Solver.QECurve.Type = 'biased'; | | Solver.QECurve.WavelengthStepSize = 'fine'; | | Solver.QECurve.JgenMonochromatic = 0.1; | | Solver.QECurve.Side = 'front'; | |  | | Solver.Electrical.MetalModelType = 'constant-potential'; | | Solver.Electrical.SkinJ0nieff.Type = 'user-T'; | | Solver.Electrical.SkinJ0nieff.T = 25 degC; | |  | | Thermal.T = 26.85 degC; | |  | | Bulk.BackgroundDoping.SettingType = 'dopingtype-resistivity'; | | Bulk.BackgroundDoping.DopingType = 'n-type'; | | Bulk.BackgroundDoping.Resistivity = 2; | | Bulk.Electrical.Recombination.Type = 'intrinsic plus SRH'; | | Bulk.Electrical.Recombination.SRH(1).Type = 'tau-Et'; | | Bulk.Electrical.Recombination.SRH(1).taun = 0.58; | | Bulk.Electrical.Recombination.SRH(1).taup = 0.58; | | Bulk.Electrical.Recombination.SRH(1).Et_Ei = 0; | |  | | ExternalCircuit.Enable = 1; | | ExternalCircuit.Rseries = 1.1; | | ExternalCircuit.Rshunt = 1e5; | | ExternalCircuit.DiodeJ0 = 0; | | ExternalCircuit.DiodeIdeality = 1; | |  | | %Text-Z | | Optical.FrontIllumination.Enable = 1; | | Optical.FrontIllumination.Spectrum.Type = 'AM1.5g'; | | Optical.FrontIllumination.Scale = 1; | | Optical.GenerationModelType = 'Text-Z'; | | Optical.TextZ.FrontText.Type = 'Text'; | | Optical.TextZ.FrontText.Text.Type = 'file'; | | Optical.TextZ.FrontText.Text.File = 'Text_front_88um_Aext.txt'; | | Optical.TextZ.FrontText.FacetAngle = 0; | | Optical.TextZ.FrontZ.Type = 'parameterization'; | | Optical.TextZ.FrontZ.Z0 = 2.472; | | Optical.TextZ.FrontZ.Zinf = 1; | | Optical.TextZ.FrontZ.Zp = 1.219; | | Optical.ScaleGeneration = 1; | |  | | SkinFeature(1).Name = 'front passivation'; | | SkinFeature(1).Geometry.Plane = 'front'; | | SkinFeature(1).Geometry.Shape = 'full'; | | SkinFeature(1).ElectricalModelType = 'lumped'; | | SkinFeature(1).Lumped.Electrical.RsheetEnable = 0; | | SkinFeature(1).Lumped.Electrical.NonContactedRecombination.ModelType = 'J0'; | | SkinFeature(1).Lumped.Electrical.NonContactedRecombination.J0 = 1e-12; | |  | | SkinFeature(3).Name = 'boron diffusion'; | | SkinFeature(3).Geometry.Plane = 'rear'; | | SkinFeature(3).Geometry.Shape = 'rectangle'; | | SkinFeature(3).Geometry.PositionX = 13 mm; % center coordinates of feature geometry | | SkinFeature(3).Geometry.PositionY = 400; | | SkinFeature(3).Geometry.SizeX = 26 mm; % full width! | | SkinFeature(3).Geometry.SizeY = 800; % full width! | | SkinFeature(3).ElectricalModelType = 'lumped'; | | SkinFeature(3).Lumped.Electrical.ConductionType = 'p-type'; | | SkinFeature(3).Lumped.Electrical.RsheetEnable = 1; | | SkinFeature(3).Lumped.Electrical.Rsheet = 166; | | SkinFeature(3).Lumped.Electrical.ContactedRecombination.ModelType = 'J0'; | | SkinFeature(3).Lumped.Electrical.ContactedRecombination.J0 = 1e-12; | | SkinFeature(3).Lumped.Electrical.NonContactedRecombination.ModelType = 'J0'; | | SkinFeature(3).Lumped.Electrical.NonContactedRecombination.J0 = 4e-13; | |  | | SkinFeature(4).Name = 'phosphorus diffusion'; | | SkinFeature(4).Geometry.Plane = 'rear'; | | SkinFeature(4).Geometry.Shape = 'rectangle'; | | SkinFeature(4).Geometry.PositionX = 13 mm; % center coordinates of feature geometry | | SkinFeature(4).Geometry.PositionY = 900; | | SkinFeature(4).Geometry.SizeX = 26 mm; % full width! | | SkinFeature(4).Geometry.SizeY = 200; % full width! | | SkinFeature(4).ElectricalModelType = 'lumped'; | | SkinFeature(4).Lumped.Electrical.ConductionType = 'n-type'; | | SkinFeature(4).Lumped.Electrical.RsheetEnable = 1; | | SkinFeature(4).Lumped.Electrical.Rsheet = 35; | | SkinFeature(4).Lumped.Electrical.ContactedRecombination.ModelType = 'J0'; | | SkinFeature(4).Lumped.Electrical.ContactedRecombination.J0 = 5e-14; | | SkinFeature(4).Lumped.Electrical.NonContactedRecombination.ModelType = 'J0'; | | SkinFeature(4).Lumped.Electrical.NonContactedRecombination.J0 = 5e-15; | |  | | ContactFeature(1).Name = 'boron contact'; | | ContactFeature(1).Geometry.Plane = 'rear'; | | ContactFeature(1).Geometry.Shape = 'rectangle'; | | ContactFeature(1).Geometry.PositionX = 13 mm; | | ContactFeature(1).Geometry.PositionY = 400; | | ContactFeature(1).Geometry.SizeX = 26 mm; | | ContactFeature(1).Geometry.SizeY = 47; | | ContactFeature(1).OhmicResistivity = 1e-3; %1e-6 Ohmcm2 <~ value <~ 1 Ohmcm2 | |  | | ContactFeature(2).Name = 'phosphorus contact'; | | ContactFeature(2).Geometry.Plane = 'rear'; | | ContactFeature(2).Geometry.Shape = 'rectangle'; | | ContactFeature(2).Geometry.PositionX = 13 mm; | | ContactFeature(2).Geometry.PositionY = 900; | | ContactFeature(2).Geometry.SizeX = 26 mm; | | ContactFeature(2).Geometry.SizeY = 47; | | ContactFeature(2).OhmicResistivity = 1e-3; | |  | | MetalFeature(1).Name = 'p metal'; | | MetalFeature(1).Geometry.Plane = 'rear'; | | MetalFeature(1).Geometry.Shape = 'rectangle'; | | MetalFeature(1).Geometry.PositionX = 13 mm; | | MetalFeature(1).Geometry.PositionY = 400; | | MetalFeature(1).Geometry.SizeX = 26 mm; | | MetalFeature(1).Geometry.SizeY = 47; | | MetalFeature(1).Electrical.Polarity = 'p-type'; | |  | | MetalFeature(2).Name = 'n metal'; | | MetalFeature(2).Geometry.Plane = 'rear'; | | MetalFeature(2).Geometry.Shape = 'rectangle'; | | MetalFeature(2).Geometry.PositionX = 13 mm; | | MetalFeature(2).Geometry.PositionY = 900; | | MetalFeature(2).Geometry.SizeX = 26 mm; | | MetalFeature(2).Geometry.SizeY = 47; | | MetalFeature(2).Electrical.Polarity = 'n-type'; | |  | | SkinFeature(5).Name = 'South Edge'; | | SkinFeature(5).Geometry.Plane = 'south'; | | SkinFeature(5).Geometry.Shape = 'full'; | | SkinFeature(5).ElectricalModelType = 'lumped'; | | SkinFeature(5).Lumped.Electrical.RsheetEnable = 1; | | SkinFeature(5).Lumped.Electrical.Rsheet = 1e5; | | SkinFeature(5).Lumped.Electrical.ConductionType = 'n-type'; | | SkinFeature(5).Lumped.Electrical.NonContactedRecombination.ModelType = 'Seff'; | | SkinFeature(5).Lumped.Electrical.NonContactedRecombination.Seff = 100;%0 cms-1 <= value <~ 1e+6 cms-1 | |  | | SkinFeature(6).Name = 'North Edge'; | | SkinFeature(6).Geometry.Plane = 'north'; | | SkinFeature(6).Geometry.Shape = 'full'; | | SkinFeature(6).ElectricalModelType = 'lumped'; | | SkinFeature(6).Lumped.Electrical.RsheetEnable = 1; | | SkinFeature(6).Lumped.Electrical.Rsheet = 1e5; | | SkinFeature(6).Lumped.Electrical.ConductionType = 'n-type'; | | SkinFeature(6).Lumped.Electrical.NonContactedRecombination.ModelType = 'Seff'; | | SkinFeature(6).Lumped.Electrical.NonContactedRecombination.Seff = 10;%0 cms-1 <= value <~ 1e+6 cms-1 | |  | | SkinFeature(7).Name = 'West Edge'; | | SkinFeature(7).Geometry.Plane = 'west'; | | SkinFeature(7).Geometry.Shape = 'full'; | | SkinFeature(7).ElectricalModelType = 'lumped'; | | SkinFeature(7).Lumped.Electrical.RsheetEnable = 1; | | SkinFeature(7).Lumped.Electrical.Rsheet = 1e5; | | SkinFeature(7).Lumped.Electrical.ConductionType = 'n-type'; | | SkinFeature(7).Lumped.Electrical.NonContactedRecombination.ModelType = 'Seff'; | | SkinFeature(7).Lumped.Electrical.NonContactedRecombination.Seff = 10;%0 cms-1 <= value <~ 1e+6 cms-1 | |  | | SkinFeature(8).Name = 'East Edge'; | | SkinFeature(8).Geometry.Plane = 'east'; | | SkinFeature(8).Geometry.Shape = 'full'; | | SkinFeature(8).ElectricalModelType = 'lumped'; | | SkinFeature(8).Lumped.Electrical.RsheetEnable = 1; | | SkinFeature(8).Lumped.Electrical.Rsheet = 1e5; | | SkinFeature(8).Lumped.Electrical.ConductionType = 'n-type'; | | SkinFeature(8).Lumped.Electrical.NonContactedRecombination.ModelType = 'Seff'; | | SkinFeature(8).Lumped.Electrical.NonContactedRecombination.Seff = 10;%0 cms-1 <= value <~ 1e+6 cms-1 | |
| --- | --- | --- | --- | --- | --- | --- | --- | --- | --- | --- | --- | --- | --- | --- | --- | --- | --- | --- | --- | --- | --- | --- | --- | --- | --- | --- | --- | --- | --- | --- | --- | --- | --- | --- | --- | --- | --- | --- | --- | --- | --- | --- | --- | --- | --- | --- | --- | --- | --- | --- | --- | --- | --- | --- | --- | --- | --- | --- | --- | --- | --- | --- | --- | --- | --- | --- | --- | --- | --- | --- | --- | --- | --- | --- | --- | --- | --- | --- | --- | --- | --- | --- | --- | --- | --- | --- | --- | --- | --- | --- | --- | --- | --- | --- | --- | --- | --- | --- | --- | --- | --- | --- | --- | --- | --- | --- | --- | --- | --- | --- | --- | --- | --- | --- | --- | --- | --- | --- | --- | --- | --- | --- | --- | --- | --- | --- | --- | --- | --- | --- | --- | --- | --- | --- | --- | --- | --- | --- | --- | --- | --- | --- | --- | --- | --- | --- | --- | --- | --- | --- | --- | --- | --- | --- | --- | --- | --- | --- | --- | --- | --- | --- | --- | --- | --- | --- | --- | --- | --- | --- | --- | --- | --- |
